# Supplementary material for: Intracellular free radical production by peripheral blood T lymphocytes from patients with systemic sclerosis: role of NADPH oxidase and ERK1/2
Source: PubMed Central journal article supplement (PMC4384301; doi:10.1186/s13075-015-0591-8), 2015-03-17
Supplement: 13075_2015_591_MOESM1_ESM.pdf [file 13075_2015_591_MOESM1_ESM.pdf]

**Table S1****Clinical characteristics of SSc cohort (n = 34)**

---

|                                                |                     |
|------------------------------------------------|---------------------|
| <b>M/F</b>                                     | <b>6/28</b>         |
| <b>mean age, years (range)</b>                 | <b>56.7 (27-84)</b> |
| <b>mean modified Rodnan skin score (range)</b> | <b>13.4 (1-30)</b>  |
| <b>subset ISSc/dSSc</b>                        | <b>17/17</b>        |
| <b>disease duration, years (range)</b>         | <b>9.4 (1-50)</b>   |
| <b>ISSc disease duration, years (range)</b>    | <b>10.3 (1-50)</b>  |
| <b>dSSc disease duration, years (range)</b>    | <b>8.5 (1-41)</b>   |

---

**ISSc = limited SSc; dSSc = diffuse SSc**
