# Supplementary material for: Intracellular free radical production by peripheral blood T lymphocytes from patients with systemic sclerosis: role of NADPH oxidase and ERK1/2
Source: PubMed Central journal article supplement (PMC4384301; doi:10.1186/s13075-015-0591-8), 2015-03-17

Figure S4

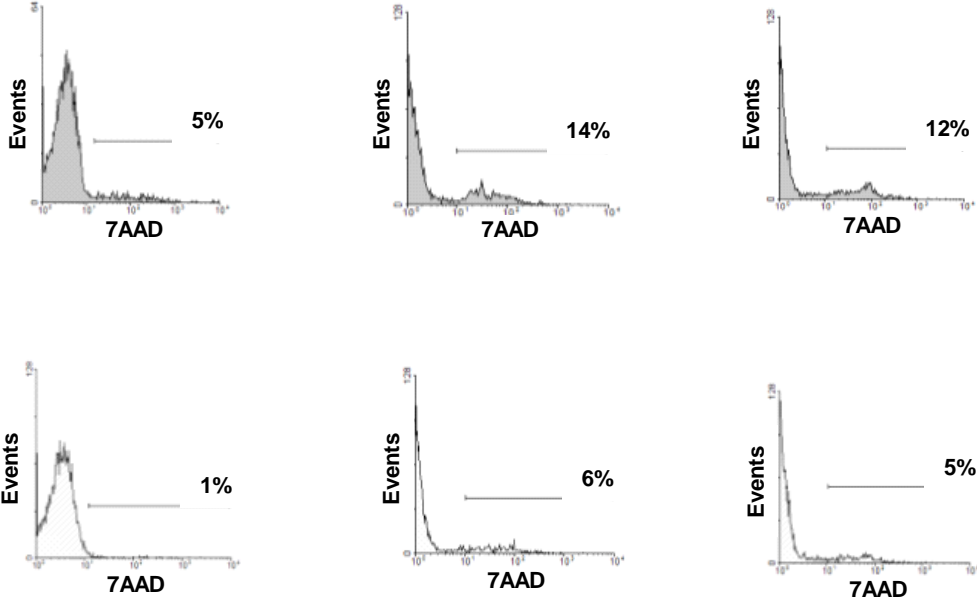

Supplement: 13075_2015_591_MOESM5_ESM.pdf [file 13075_2015_591_MOESM5_ESM.pdf]
